# Supplementary material for: De-MetaST-BLAST: A Tool for the Validation of Degenerate Primer Sets and Data Mining of Publicly Available Metagenomes
Source: PLoS One. 2012 Nov 26;7(11):e50362. doi: 10.1371/journal.pone.0050362 (PMC3506598; doi:10.1371/journal.pone.0050362)
Supplement: File S2 — Archive containing the source code for De-MetaST-BLAST. (GZ) [file pone.0050362.s003.gz]

Archive with 14 entries (12 files):
- De-MetaST-BLAST/Table/makefile
- De-MetaST-BLAST/Table/Table_builder.cpp
- De-MetaST-BLAST/Primer.h
- De-MetaST-BLAST/Primers.txt
- De-MetaST-BLAST/PrimerLib.cpp
- De-MetaST-BLAST/Search.h
- De-MetaST-BLAST/makefile
- De-MetaST-BLAST/LICENSE.txt
- De-MetaST-BLAST/PrimerDriver.cpp
- De-MetaST-BLAST/README-De-MetaST-BLAST.txt
- De-MetaST-BLAST/README-De-MetaST-BLAST.pdf
- De-MetaST-BLAST/De-MetaST-BLAST.cpp
- De-MetaST-BLAST/Table
- De-MetaST-BLAST
