# Supplementary material for: De-MetaST-BLAST: A Tool for the Validation of Degenerate Primer Sets and Data Mining of Publicly Available Metagenomes
Source: PLoS One. 2012 Nov 26;7(11):e50362. doi: 10.1371/journal.pone.0050362 (PMC3506598; doi:10.1371/journal.pone.0050362)
Supplement: File S2 — Archive containing the source code for De-MetaST-BLAST. (GZ) [file pone.0050362.s003.gz › De-MetaST-BLAST/makefile]

CC = g++

CFLAGS = -g 

EXECUTABLES: De-MetaST-BLAST

all: $(EXECUTABLES)

.SUFFIXES: .cpp .o
.cpp.o:
	$(CC) $(CFLAGS) -c $*.cpp

De-MetaST-BLAST: De-MetaST-BLAST.o PrimerDriver.o PrimerLib.o
	$(CC) $(CFLAGS) -o $@ *.o
    
# make clean will rid your directory of the executable,
# object files, and any core dumps you've caused
clean:
	rm De-MetaST-BLAST *.o
