# Supplementary material for: De-MetaST-BLAST: A Tool for the Validation of Degenerate Primer Sets and Data Mining of Publicly Available Metagenomes
Source: PLoS One. 2012 Nov 26;7(11):e50362. doi: 10.1371/journal.pone.0050362 (PMC3506598; doi:10.1371/journal.pone.0050362)
Supplement: File S2 — Archive containing the source code for De-MetaST-BLAST. (GZ) [file pone.0050362.s003.gz › De-MetaST-BLAST/Table/makefile]

CC = g++

CFLAGS = -O2

.SUFFIXES: .cpp .o

.cpp.o:
	$(CC) $(CFLAGS) -c $*.cpp

Table_builder: *.o
	$(CC) $(CFLAGS) -o $@ $^

.PHONEY: clean

clean:
	rm Table_builder *.o
